# Supplementary material for: Comparison of Overall and Comorbidity-Free Life Expectancy Between Insured Adults With and Without HIV Infection, 2000-2016
Source: PubMed Central journal article supplement — JAMA Netw Open. 2020 Jun 15;3(6):e207954. doi: 10.1001/jamanetworkopen.2020.7954 (PMC7296391; doi:10.1001/jamanetworkopen.2020.7954), 2020-06-15
Supplement: jamanetwopen-3-e207954-s001.pdf [file jamanetwopen-3-e207954-s001.pdf]

## Supplementary Online Content

Marcus JL, Leyden WA, Alexeeff SE, et al. Comparison of overall and comorbidity-free life expectancy between insured adults with and without HIV infection, 2000-2016. *JAMA Netw Open*. 2020;3(6):e207954. doi:10.1001/jamanetworkopen.2020.7954

**eTable 1.** Definitions of Major Chronic Comorbidities and Substance Use Variables

**eTable 2.** Overall and Comorbidity-Free Life Expectancy at Age 21 Years for Individuals With and Without HIV Infection, and for Individuals With HIV Infection Who Initiated ART With CD4  $\geq$ 350 Cells/ $\mu$ L, Kaiser Permanente, 2011-2016

**eTable 3.** Overall and Comorbidity-Free Life Expectancy at Age 21 Years for Women and Men With and Without HIV Infection, Kaiser Permanente, 2011-2016

This supplementary material has been provided by the authors to give readers additional information about their work.

| <b>eTable 1. Definitions of Major Chronic Comorbidities and Substance Use Variables</b>                                                                                                |                                                                                                                                                                                                                                  |                                                                                                                                                                                                                                                                              |
|----------------------------------------------------------------------------------------------------------------------------------------------------------------------------------------|----------------------------------------------------------------------------------------------------------------------------------------------------------------------------------------------------------------------------------|------------------------------------------------------------------------------------------------------------------------------------------------------------------------------------------------------------------------------------------------------------------------------|
|                                                                                                                                                                                        | Definition                                                                                                                                                                                                                       | ICD-9 and ICD-10 codes                                                                                                                                                                                                                                                       |
| <b>Comorbidity</b>                                                                                                                                                                     |                                                                                                                                                                                                                                  |                                                                                                                                                                                                                                                                              |
| Chronic liver disease                                                                                                                                                                  | Inpatient or outpatient diagnosis                                                                                                                                                                                                | <b>ICD-9:</b> 70.2x, 70.3x, 70.4x, 70.5x, 70.6x, 70.7x, 70.9x, 570.xx, 571.xx, 572.xx, 573.xx<br><b>ICD-10:</b> B17.1x, B18.xx, B19.2x, K70.xx, K71.xx, K72.xx, K73.xx, K74.xx, K75.xx, K76.xx, K91.83, P78.81                                                               |
| Chronic kidney disease                                                                                                                                                                 | At least two measures of estimated glomerular filtration rate <60 mL/min at least 90 days apart                                                                                                                                  | N/A                                                                                                                                                                                                                                                                          |
| Chronic lung disease                                                                                                                                                                   | Inpatient or outpatient diagnosis                                                                                                                                                                                                | <b>ICD-9:</b> 490.xx, 491.xx, 492.xx, 493.xx, 494.xx, 495.xx, 496.xx, 516.xx, 517.xx, 518.xx<br><b>ICD-10:</b> B25.0, J41.xx, J42.xx, J44.xx, J45.xx, J47.xx, J67.xx, J68.xx, J70.xx, J84.xx, J95.822, J96.xx, J98.xx, J99.xx, M30.1x, M32.13, M33.xx, M34.81, M35.02, Q33.4 |
| Diabetes                                                                                                                                                                               | ≥2 inpatient or outpatient diagnoses or ≥1 prescriptions indicative of diabetes mellitus, excluding possible gestational diabetes and women receiving metformin/thiazolidinedione without other indications of diabetes mellitus | <b>ICD-9:</b> 250.xx, 648.xx, 790.xx<br><b>ICD-10:</b> E08, E09, E10, E11, E13, O24.0x, O24.1x, O24.3x, O24.8x                                                                                                                                                               |
| Cancer                                                                                                                                                                                 | Any invasive cancer recorded in the KPNC, KPSC, and KPMAS cancer registries                                                                                                                                                      | N/A                                                                                                                                                                                                                                                                          |
| Cardiovascular disease                                                                                                                                                                 | Inpatient or outpatient diagnosis                                                                                                                                                                                                | <b>ICD-9:</b> 410.xx, 411.xx, 413.xx, 414.xx, 433.xx, 434.xx, 436.xx<br><b>ICD-10:</b> G43.xx, G46.xx, G95.xx, I20.xx, I21.xx, I22.xx, I23.xx, I24.xx, I25.xx, I63.xx, I97.xx                                                                                                |
| <b>Substance use</b>                                                                                                                                                                   |                                                                                                                                                                                                                                  |                                                                                                                                                                                                                                                                              |
| Alcohol use disorders                                                                                                                                                                  | Inpatient or outpatient diagnosis                                                                                                                                                                                                | <b>ICD-9:</b> 291.xx, 303.xx, 305.0x<br><b>ICD-10:</b> F10.xx                                                                                                                                                                                                                |
| Drug use disorders                                                                                                                                                                     | Inpatient or outpatient diagnosis                                                                                                                                                                                                | <b>ICD-9:</b> 292.xx, 304.xx, 305.2x, 305.3x, 305.4x, 305.5x, 305.6x, 305.7x, 305.8x, 305.9x<br><b>ICD-10:</b> F11.xx, F12.xx, F13.xx, F14.xx, F15.xx, F16.xx, F18.xx, F19.xx                                                                                                |
| Smoking/tobacco use                                                                                                                                                                    | Record of current smoker or former smoker in social history file                                                                                                                                                                 | N/A                                                                                                                                                                                                                                                                          |
| ICD, International Classification of Diseases; KPNC, Kaiser Permanente Northern California; KPSC, Kaiser Permanente Southern California; KPMAS, Kaiser Permanente Mid-Atlantic States. |                                                                                                                                                                                                                                  |                                                                                                                                                                                                                                                                              |

**eTable 2.** Overall and Comorbidity-Free Life Expectancy at Age 21 Years for Individuals With and Without HIV Infection, and for Individuals With HIV Infection Who Initiated ART With CD4  $\geq$ 350 cells/ $\mu$ L, Kaiser Permanente, 2011-2016

|                        | Life expectancy at age 21 years (95% CI) |                                                           |                     |                           |                                                                                |
|------------------------|------------------------------------------|-----------------------------------------------------------|---------------------|---------------------------|--------------------------------------------------------------------------------|
|                        | HIV+                                     | HIV+ with CD4 $\geq$ 350 cells/ $\mu$ L at ART initiation | HIV-                | Difference: HIV+ vs. HIV- | Difference: HIV+ with CD4 $\geq$ 350 cells/ $\mu$ L at ART initiation vs. HIV- |
| Overall                | 54.9 (54.0 to 55.9)                      | 57.4 (56.2 to 58.6)                                       | 64.2 (64.0 to 64.4) | 9.2 (8.3 to 10.2)         | 6.8 (5.6 to 8.0)                                                               |
| Comorbidity-free       | 13.7 (13.0 to 14.4)                      | 19.8 (18.5 to 21.2)                                       | 29.0 (28.6 to 29.3) | 15.3 (14.5 to 16.1)       | 9.2 (7.8 to 10.6)                                                              |
| Chronic liver disease  | 33.1 (31.9 to 34.2)                      | 43.7 (41.6 to 45.8)                                       | 57.6 (57.3 to 57.9) | 24.5 (23.3 to 25.7)       | 13.9 (11.8 to 16.0)                                                            |
| Chronic kidney disease | 40.2 (39.5 to 41.0)                      | 43.1 (42.0 to 44.3)                                       | 56.3 (56.0 to 56.5) | 16.1 (15.3 to 16.9)       | 13.1 (11.9 to 14.3)                                                            |
| Chronic lung disease   | 23.4 (22.3 to 24.6)                      | 30.8 (28.6 to 32.9)                                       | 38.5 (38.0 to 38.9) | 15.0 (13.7 to 16.3)       | 7.7 (5.5 to 9.9)                                                               |
| Diabetes               | 44.2 (43.2 to 45.3)                      | 52.6 (50.9 to 54.4)                                       | 51.7 (51.3 to 52.0) | 7.4 (6.4 to 8.5)          | -1.0 (-2.8 to 0.8)                                                             |
| Cancer                 | 48.1 (47.0 to 49.1)                      | 53.4 (51.7 to 55.1)                                       | 58.0 (57.7 to 58.2) | 9.9 (8.8 to 11.0)         | 4.6 (2.9 to 6.3)                                                               |
| Cardiovascular disease | 51.8 (50.9 to 52.7)                      | 56.7 (55.2 to 58.2)                                       | 60.8 (60.5 to 61.0) | 9.0 (8.0 to 9.9)          | 4.0 (2.5 to 5.6)                                                               |

ART, antiretroviral therapy. Comorbidity-free years were those lived before incident diagnosis of any of the six common comorbidities.

| <b>eTable 3.</b> Overall and Comorbidity-Free Life Expectancy at Age 21 Years for Women and Men With and Without HIV Infection, Kaiser Permanente, 2011-2016 |                                          |                     |                     |                     |                                 |                               |
|--------------------------------------------------------------------------------------------------------------------------------------------------------------|------------------------------------------|---------------------|---------------------|---------------------|---------------------------------|-------------------------------|
|                                                                                                                                                              | Life expectancy at age 21 years (95% CI) |                     |                     |                     |                                 |                               |
|                                                                                                                                                              | HIV+ women                               | HIV+ men            | HIV- women          | HIV- men            | Difference: HIV+ vs. HIV- women | Difference: HIV+ vs. HIV- men |
| Overall                                                                                                                                                      | 55.0 (53.0 to 57.0)                      | 54.9 (53.9 to 55.8) | 67.1 (66.4 to 67.9) | 63.8 (63.6 to 64.1) | 12.1 (10.0 to 14.3)             | 9.0 (8.0 to 10.0)             |
| Comorbidity-free                                                                                                                                             | 13.4 (11.3 to 15.5)                      | 13.7 (13.0 to 14.4) | 26.1 (25.0 to 27.3) | 29.3 (29.0 to 29.7) | 12.7 (10.4 to 15.1)             | 15.6 (14.8 to 16.5)           |
| Chronic liver disease                                                                                                                                        | 37.0 (33.4 to 40.7)                      | 32.4 (31.2 to 33.6) | 62.2 (61.3 to 63.1) | 57.0 (56.7 to 57.4) | 25.2 (21.4 to 29.0)             | 24.6 (23.4 to 25.9)           |
| Chronic kidney disease                                                                                                                                       | 40.7 (38.7 to 42.6)                      | 39.9 (39.1 to 40.7) | 56.9 (56.2 to 57.5) | 56.2 (56.0 to 56.5) | 16.2 (14.2 to 18.2)             | 16.4 (15.5 to 17.2)           |
| Chronic lung disease                                                                                                                                         | 21.3 (18.0 to 24.6)                      | 23.8 (22.6 to 25.1) | 33.0 (31.5 to 34.4) | 39.2 (38.7 to 39.6) | 11.7 (8.1 to 15.3)              | 15.3 (14.0 to 16.7)           |
| Diabetes                                                                                                                                                     | 41.6 (38.5 to 44.8)                      | 44.6 (43.5 to 45.6) | 53.2 (52.1 to 54.3) | 51.5 (51.2 to 51.9) | 11.5 (8.2 to 14.9)              | 7.0 (5.9 to 8.1)              |
| Cancer                                                                                                                                                       | 52.4 (50.1 to 54.8)                      | 48.0 (46.9 to 49.2) | 60.2 (59.3 to 61.0) | 57.7 (57.5 to 58.0) | 7.7 (5.2 to 10.2)               | 9.7 (8.5 to 10.9)             |
| Cardiovascular disease                                                                                                                                       | 53.2 (50.8 to 55.7)                      | 51.7 (50.7 to 52.7) | 64.6 (63.9 to 65.4) | 60.3 (60.0 to 60.6) | 11.4 (8.8 to 13.9)              | 8.6 (7.6 to 9.6)              |

ART, antiretroviral therapy. Comorbidity-free years were those lived before incident diagnosis of any of the six common comorbidities.
